# Supplementary material for: Alcohol Consumption during a Pandemic Lockdown Period and Change in Alcohol Consumption Related to Worries and Pandemic Measures
Source: PubMed Central journal article supplement (PMC7908087; doi:10.3390/ijerph18031220), 2021-01-29
Supplement: ijerph-18-01220-s001.pdf [file ijerph-18-01220-s001.pdf]

**Table S1.** Percentage of decreased alcohol consumption in relation to age and gender.

| <b>Age</b>                                   | <b>18–29</b>   | <b>30–39</b> | <b>40–49</b> | <b>50–59</b> | <b>60–69</b> | <b>70+</b>   | <b>Total</b>   |
|----------------------------------------------|----------------|--------------|--------------|--------------|--------------|--------------|----------------|
| Decreased alcohol consumption (both genders) | 1,455<br>(48%) | 926<br>(25%) | 904<br>(21%) | 899<br>(19%) | 631<br>(15%) | 466<br>(15%) | 5,281<br>(23%) |
| Women                                        | 961<br>(50%)   | 504<br>(23%) | 487<br>(20%) | 480<br>(18%) | 322<br>(15%) | 224<br>(15%) | 2,978<br>(23%) |
| Men                                          | 494<br>(47%)   | 422<br>(28%) | 417<br>(23%) | 419<br>(20%) | 309<br>(15%) | 242<br>(14%) | 2,303<br>(22%) |

\* Population weighted estimates (age, gender, education) for percentages

**Table S2.** Hazardous drinking with a medium threshold (AUDIT-C score >4 for women and >5 for men) in relation to age for all in addition to women and men, separately.

| <b>Age</b>                                | <b>18–29</b>   | <b>30–39</b>   | <b>40–49</b>   | <b>50–59</b>   | <b>60–69</b>   | <b>70+</b>   | <b>Total</b>   |
|-------------------------------------------|----------------|----------------|----------------|----------------|----------------|--------------|----------------|
| Hazardous drinking<br>(mt) (both genders) | 1,735<br>(52%) | 1,364<br>(33%) | 1,554<br>(33%) | 1,693<br>(32%) | 1,376<br>(31%) | 646<br>(18%) | 8,368<br>(33%) |
| Women                                     | 1,146<br>(53%) | 819<br>(33%)   | 923<br>(34%)   | 932<br>(31%)   | 667<br>(29%)   | 308<br>(18%) | 4,795<br>(54%) |
| Men                                       | 589<br>(50%)   | 545<br>(33%)   | 631<br>(32%)   | 761<br>(33%)   | 709<br>(32%)   | 338<br>(18%) | 3,573<br>(32%) |

mt: medium threshold defined with an AUDIT-C score >4 for women and >5 for men.

**Table S3.** Hazardous drinking with a higher threshold (AUDIT-C score >5 for women and >6 for men) in relation to age for all in addition to women and men, separately.

| <b>Age</b>                                | <b>18–29</b>   | <b>30–39</b> | <b>40–49</b> | <b>50–59</b> | <b>60–69</b> | <b>70+</b>  | <b>Total</b>   |
|-------------------------------------------|----------------|--------------|--------------|--------------|--------------|-------------|----------------|
| Hazardous drinking (ht)<br>(both genders) | 1,119<br>(34%) | 716<br>(17%) | 781<br>(17%) | 912<br>(17%) | 719<br>(16%) | 281<br>(8%) | 4,528<br>(18%) |
| Women                                     | 696<br>(32%)   | 376<br>(15%) | 395<br>(14%) | 453<br>(15%) | 304<br>(13%) | 116<br>(7%) | 2,340<br>(16%) |
| Men                                       | 423<br>(36%)   | 340<br>(21%) | 386<br>(19%) | 459<br>(20%) | 415<br>(19%) | 165<br>(9%) | 2,188<br>(20%) |

ht: high threshold defined with an AUDIT-C score >5 for women and >6 for men.

**Table S4.** Factors associated with decrease in alcohol consumption during COVID-19 pandemic phase assessed with logistic regression presented with odds ratios and 95% confidence intervals.

| <b>Variables</b>     | <b>Unadjusted<br/>OR (95% CI)</b> | <b>Adjusted<br/>OR (95% CI)</b> |
|----------------------|-----------------------------------|---------------------------------|
| 18–29                | 6.7 (5.9–7.7)*                    | 4.8 (4.2–5.5)*                  |
| 30–39                | 3.2 (2.8–3.6)*                    | 2.3 (2.0–2.7)*                  |
| 40–49                | 2.3 (2.0–2.6)*                    | 1.8 (1.5–2.0)*                  |
| 50–59                | 1.7 (1.5–1.9)*                    | 1.3 (1.2–1.5)*                  |
| 60–69                | 1.3 (1.2–1.5)*                    | 1.2 (1.0–1.3)*                  |
| 70+                  | 1.0                               | 1.0                             |
| Female               | 1.0                               | 1.0                             |
| Male                 | 1.0 (0.97–1.1)                    | 1.1 (1.1–1.2)*                  |
| Temporarily laid-off | 1.7 (1.6–1.9)*                    | 1.3 (1.1–1.4)*                  |
| Quarantine           | 1.4 (1.2–1.5)*                    | 1.2 (1.1–1.4)*                  |
| Home office/studying | 1.9 (1.7–2.0)*                    | 1.4 (1.3–1.5)*                  |
| Economic worries     | 1.7 (1.6–1.9)*                    | 1.3 (1.2–1.4)*                  |
| Health worries       | 1.3 (1.2–1.4)*                    | 1.2 (1.1–1.3)*                  |

Note. OR = Odds ratio, CI = confidence interval

\* Significantly different from reference group (p<0.05)

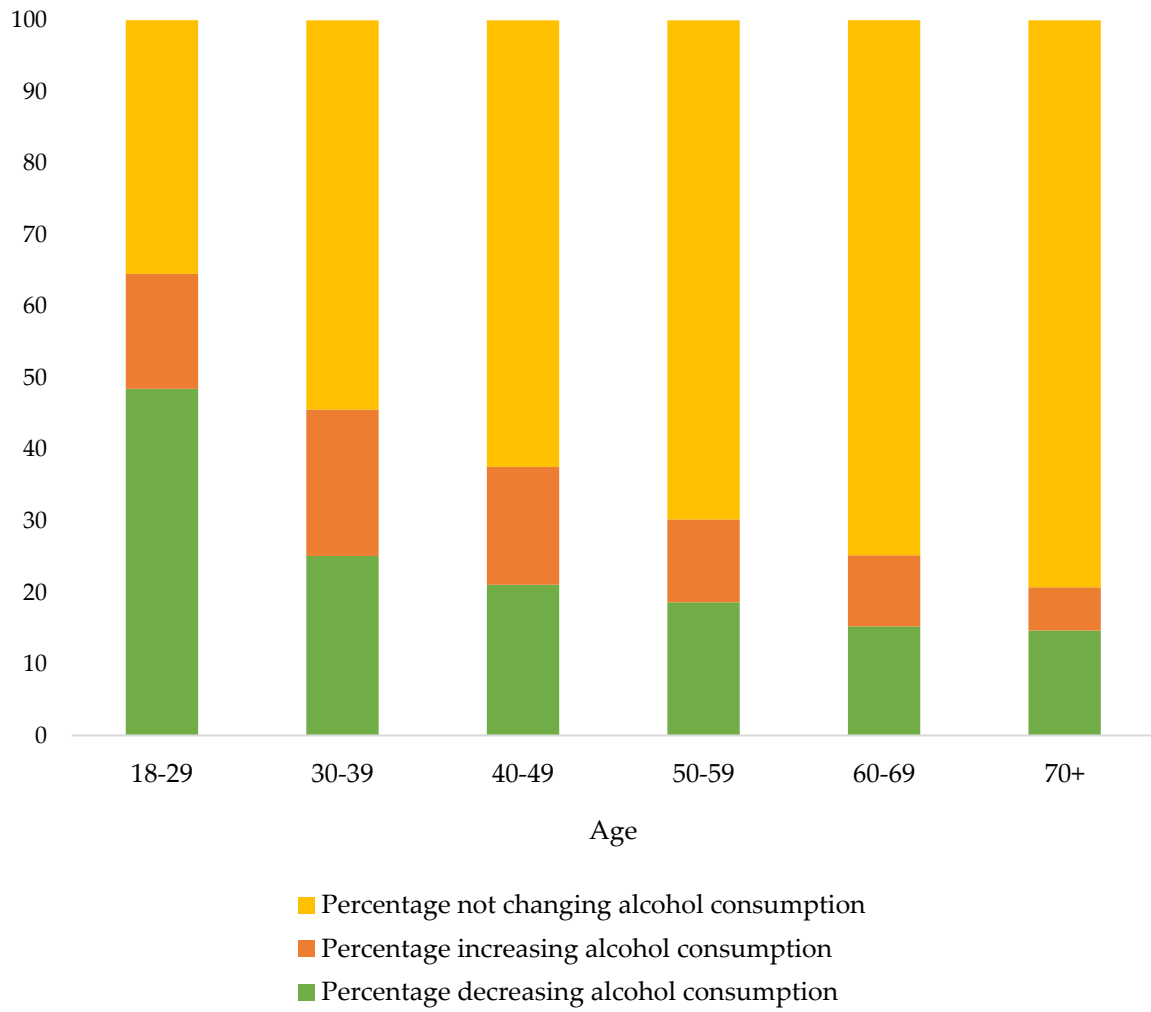

**Figure S1:** Percentage of decreased, increased, and unchanged alcohol consumption in relation to age.

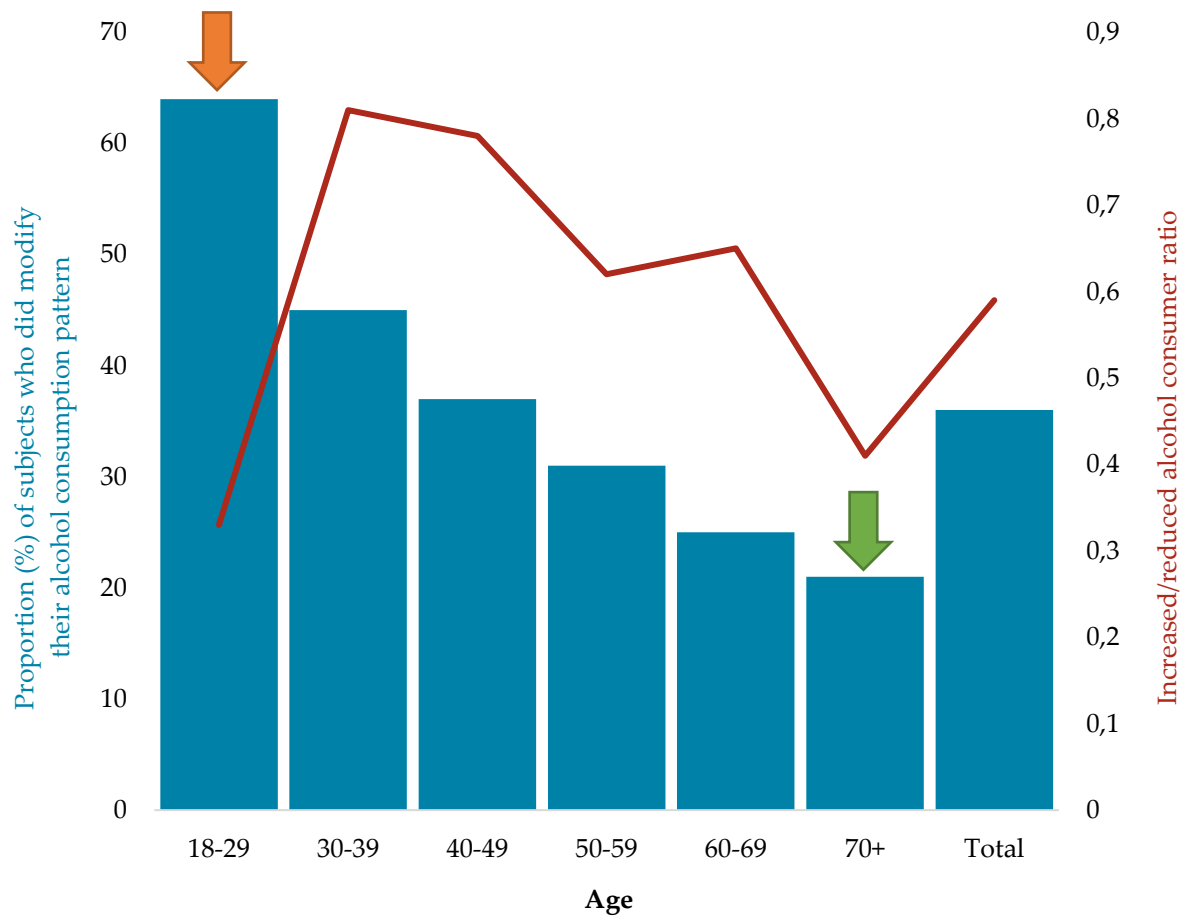

**Figure S2:** Proportion of subjects who did modify their alcohol consumption during the pandemic period. Blue bars/left axis indicate proportion who changed alcohol consumption while red line/right axis indicates the ratio between increased/reduced consumption. The youngest participants (orange arrow) were most likely to change alcohol consumption (most often a reduction) while the oldest participants were least likely to change consumption (green arrow), but when they did a reduction was also most common.
